# Supplementary material for: Redox signalling regulates breast cancer metastasis via phenotypic and metabolic reprogramming due to p63 activation by HIF1α
Source: PubMed Central journal article supplement (PMC10951347; doi:10.1038/s41416-023-02522-5), 2024-01-18
Supplement: 41416_2023_2522_MOESM7_ESM.pdf [file 41416_2023_2522_MOESM7_ESM.pdf]

## **Supplemental figures**

### **Fig. S1. scRNAseq reveals basal/mesenchymal cluster 3 is enriched in an EMT gene signature.**

(A) Volcano plot shows the differentially expressed genes between cluster 3 (cell number: 1666) and clusters 0, 1, 2, 4, 5, 6 (cell number: 13433). X-axis is a Log transformation of mRNA fold change at base 2. Y-axis is a negative Log transformation of p-Value at base 10. Yellow dot indicates significantly expressed genes ( $p < 0.05$ ); Green dot highlights top genes with  $\log_2$  [FC] less than -1 and  $-\log_{10}$  [p-Value] greater than 100 that are significantly upregulated in luminal-like clusters 0, 1, 2, 4, 5, 6. Red dot highlights top genes with  $\log_2$  [FC] greater than 1 and  $-\log_{10}$  [p-Value] greater than 100 that are significantly upregulated in basal/mesenchymal-like cluster 3. (B) Waterfall plot shows  $\log_2$ [FC] values for the differentially and significantly expressed EMT and stem-like genes in cluster 3 vs clusters 0, 1, 2, 4, 5, 6 ( $p < 0.05$ ).

### **Fig. S2. Cell trajectory analysis highlights a transcriptional EMT continuum across clusters**

(A) UMAP projection of six luminal-like cluster and one basal/mesenchymal-like cluster from PyMT1 control and PyMT1/GPx2 KD tumors; the bifurcated line indicates a branched trajectory from the root of the path to one of the terminal nodes. (B) Pseudotime time trajectories projected onto UMAP in (A); colors reflects pseudotime distance between the clusters with cluster 3 representing the mesenchymal transcriptional node, located at  $t = 0$ . (C-G) Gene expression levels of luminal/epithelial (*Krt18*, *Epcam*) and basal/mesenchymal (*Krt14*, *S100a6*, *Col1a1*) genes in individual cells across all clusters over pseudotime in PyMT1/GPx2 KD vs control PyMT1 tumor are shown; colors (left two columns) reflect individual clusters in UMAP projection over pseudotime distance, and colors (right two columns) display pseudotime distance (basal/mesenchymal cluster 3 located at  $t = 0$ ).

### **Fig. S3. Exogenous expression of GPx2 in PyMT2 cells inhibits the EMT continuum**

(A) Immunofluorescent staining for E-CAD, N-CAD, KRT14, and VIM in PyMT2 control tumors (n=6) and PyMT2/GPx2-OE tumors (n=6) from 3 mice each. Three random sections from each tumor were

immunostained. Representative images are shown. **(B-C)** Co-immunostaining of KRT8 with KRT14 (B), or VIM with E-CAD (C) in PyMT2 control tumors and PyMT2/GPx2-OE tumors from 3 mice each.

**Fig. S4. Heatmap of unsupervised clustering of top 30 differentially expressed genes between lung mets and primary GPx2KD tumor using integrated transcriptomics.** Four luminal clusters (cluster 0, 1, 3, 4) expressing (*Cldn3*, *Krt8*, and *Krt18*); cluster 3 was enriched in proliferative genes (*Ran*, *Cks1b*, and *Cks2*). Cluster 2 was basal/mesenchymal-like (*Col18a1*, *Vcam1*, *Col1a1*, *Vim*, *Sparc*); cluster 5: macrophage-like (*Ccr5*, *Col4a1*), and cluster 6: fibroblast-like (*Acta2*, *Col12a1*).

**Fig. S5. GPx2 OE or HIF1 $\alpha$  inhibition suppresses EMT dynamics and metabolic plasticity**

**(A)** Co-staining for KRT8/KRT18/GLUT1/pAMPK in GPx2 KD tumors (n=6) that were treated with DMSO (left) or echinomycin (right) from 3 mice is shown in representative sections. **(B-C)** Co-staining the four above markers in PyMT2 control vs PyMT2/GPx2OE tumors (B) and in PyMT2/dCas9 vs PyMT2/GPx2-gRNA2 tumors (C); (n=6) from 3 mice each.

**Fig. S6. GPx2 OE in human BC JIMT1 cells suppresses tumor growth and EMT dynamics**

**(A)** Immunoblotting analysis of GPx2 vs ACTIN in JIMT1 control and GPx2 OE cell lysates. **(B)** JIMT1 control and GPx2 OE cells ( $1 \times 10^6$ ) were bilaterally injected into mammary fat pads of female athymic nude mice (n=3 each group); representative images of tumor growth at 68 days post onset are shown (upper panels); Mean  $\pm$ SEM; \*p < 0.05. **(C)** Immunofluorescent co-staining for VIM and E-CAD in GPx2 OE vs control JIMT1 tumors (n=6) from 3 mice each. **(D)** Co-staining for E-CAD/VIM/GLUT/pAMPK in GPx2 OE vs control JIMT1 tumors (n=6).
